# Supplementary material
Source: Springer Nature journal article supplement (https://www.springermedizin.de/resource/supplementary/12885_2009_1876_MOESM4_ESM.pdf/9461464)

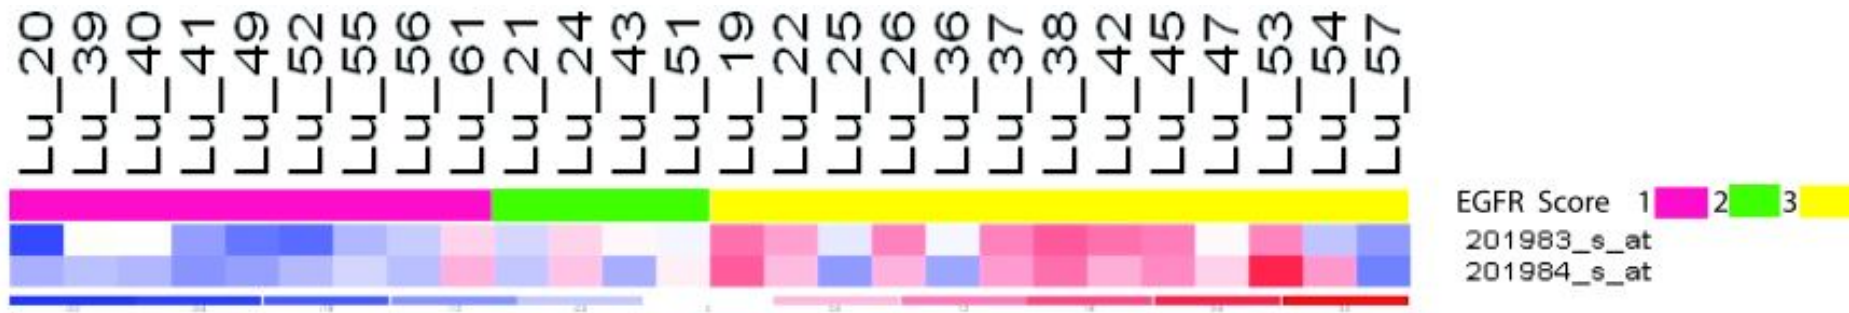

**A**

|                         | 201983_s_at | 201984_s_at |
|-------------------------|-------------|-------------|
| Correlation Coefficient | 0,585       | 0,471       |
| P Value                 | 0,00175     | 0,0153      |
| Number of Samples       | 26          | 26          |

**B**

Supplement: MOESM4 [file 9461464]
